# Supplementary material for: Downregulation of stromal syntenin sustains AML development
Source: PubMed Central journal article supplement (PMC10630886; doi:10.15252/emmm.202317570), 2023-10-11
Supplement: EMMM-15-e17570-s009.pdf [file EMMM-15-e17570-s009.pdf]

# **Leblanc et al., Downregulation of stromal syntenin sustains AML development.**

## **Table of Contents**

|                    |    |
|--------------------|----|
| Appendix Figure S1 | 2  |
| Appendix Figure S2 | 4  |
| Appendix Figure S3 | 6  |
| Appendix Figure S4 | 8  |
| Appendix Figure S5 | 9  |
| Appendix Table S1  | 10 |
| Appendix Table S2  | 11 |

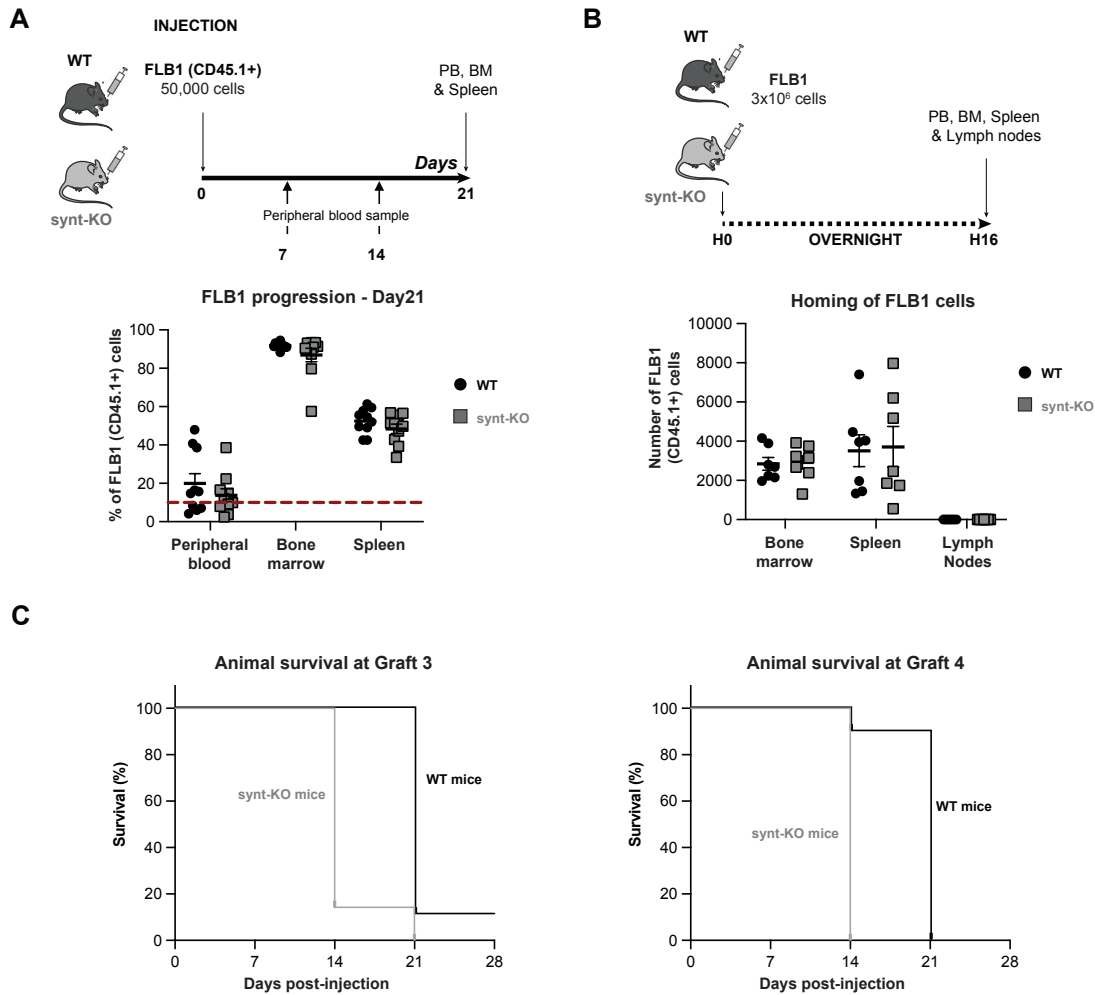

**Appendix Fig. S1 (related to figure 2). Invasion and colonization of hematopoietic tissues (peripheral blood, bone marrow, spleen and lymph nodes) by FLB1 upon first transplantation (A,B) and animal survival upon serial transplantation (C), in wild-type versus syntenin-deficient animals. (A)** Upper part, scheme for the invasion assay. Non-irradiated 8-11w old wild-type (WT) and syntenin-knock-out (synt-KO) mice were injected with 50,000 FLB1 cells in the retro-orbital vein. Lower part, FACS analysis monitoring leukemia progression at day 21 in different tissues (as indicated). The dot-plot summarizes the percentage of CD45.1 FLB1 cells, relative to the total number of CD45+ cells  $\pm$  SEM, in the different organs. **(B)** Upper part, scheme for the homing assay. Non-irradiated 8-10wks old WT and KO mice were injected with  $3 \times 10^6$  FLB1 cells in the retro-orbital vein. 12 hours after cell injection, animals were sacrificed and BM, spleen and lymph nodes were collected for analysis. Lower part, FACS analysis monitoring the number of FLB1 cells (using FITC-conjugated CD45.1-antibody) in different WT and synt-KO tissues as indicated. The dot-plot indicates mean values  $\pm$  SEM. **(C)** Kaplan-Meier-like plot related to **fig. 1B**, comparing the survival of WT and synt-KO mice at graft 3 and 4. All animals were sacrificed when blast levels

reached >10% in the peripheral blood. The survival curves for WT and synt-KO animals at graft 3 and 4 are significantly different using the log-rank test (\*\*\*;  $P < 0.0001$ ).

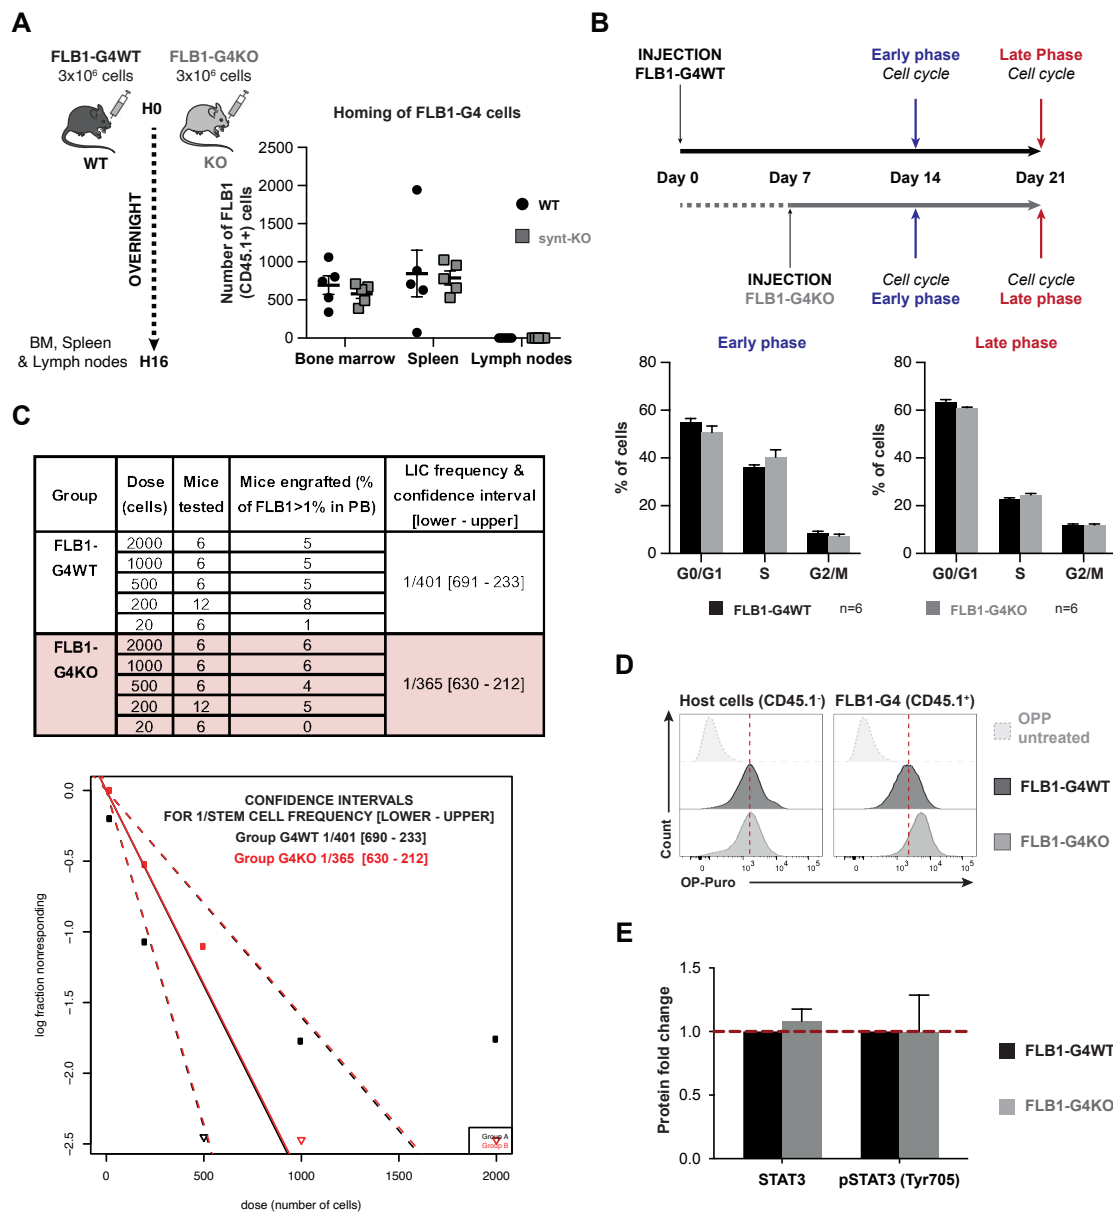

**Appendix Fig. S2. (related to figure 3). FLB1-G4KO display similar homing, cell cycling and clonogenic properties as FLB1-G4WT. (A)** Left, scheme of the homing assay. Non-irradiated 8-10wks old WT and Synt-KO mice were injected with  $3 \times 10^6$  FLB1-G4WT or FLB1-G4KO cells in the retro-orbital vein. 16 hours after cell injection, animals were sacrificed and BM, spleen and lymph nodes were collected for analysis. Numbers of FLB1 cells in the BM and the spleen were counted by FACS, using the CD45.1-FITC antibody and CountBright™ Absolute Counting Beads according to the manufacturer. Results are expressed as mean number of CD45.1 cells per organ  $\pm$  SEM. No signal was observed in lymph nodes. **(B)** Extreme Limiting Dilution Assay (ELDA) was performed to compare the frequency of Leukemia Initiating Cells (LIC) in FLB1-G4WT and

FLB1-G4KO. Upper part, table illustrating the ELDA performed by injecting decreasing numbers of sorted FLB1-G4WT or FLB1-G4KO cells, as indicated in the “dose column”. The mice were considered as engrafted when FLB1 (CD45.1) cells were detectable in the peripheral blood and composed at least 1% of the total cells in that compartment, with the numbers of successful engraftments indicated in the column “mice engrafted”. LIC frequencies for FLB1-G4WT and FLB1-G4KO were estimated, as well as the interval of confidence for each condition. Lower part, log-fraction plot illustrating the ELDA fitted to FLB1-G4WT vs FLB1-G4KO. The slope of the line represents the estimated LIC frequency. LIC frequencies of FLB1-G4WT (black line) and FLB1-G4KO (red line) are respectively 1/401 and 1/365. The dotted (black and red) lines indicate the 95% confidence intervals. **(C)** Upper part, scheme for the cell-cycling assay. FLB1-G4WT cells were injected at day 0 into WT mice, while the injection of FLB1-G4KO cells into synt-KO mice (evolving more rapidly) occurred one week later. Cell cycling was analyzed at both early (day 14) and late (day 21) phases of leukemia progression. Animals were sacrificed and their BM was stained with propidium iodide. Lower part, the cell cycle stage of the CD45.1+ cells was then analyzed by FACS. Results are expressed as percentage of cells in the different phases of the cell cycle  $\pm$  SEM. **(D)** Representative histograms showing OPP incorporation into host cells (CD45.1<sup>-</sup>, left) and FLB1-G4 cells (CD45.1<sup>+</sup>, right) isolated from the BM of WT (black histogram), synt-KO (dark gray histogram) mice, or from the BM of a PBS-injected control mouse (OPP untreated; light gray histogram). Note the higher incorporation of OPP in FLB1-G4KO compared to FLB1-G4WT. **(E)** Histogram representing mean STAT3 and pSTAT3 signal intensities  $\pm$  SEM, relative to signals obtained with FLB1-G4WT lysates, calculated from the analysis of 3 independent mice. Note, the absence of significant difference. Statistical analysis was performed using the nonparametric Mann-Whitney U test.

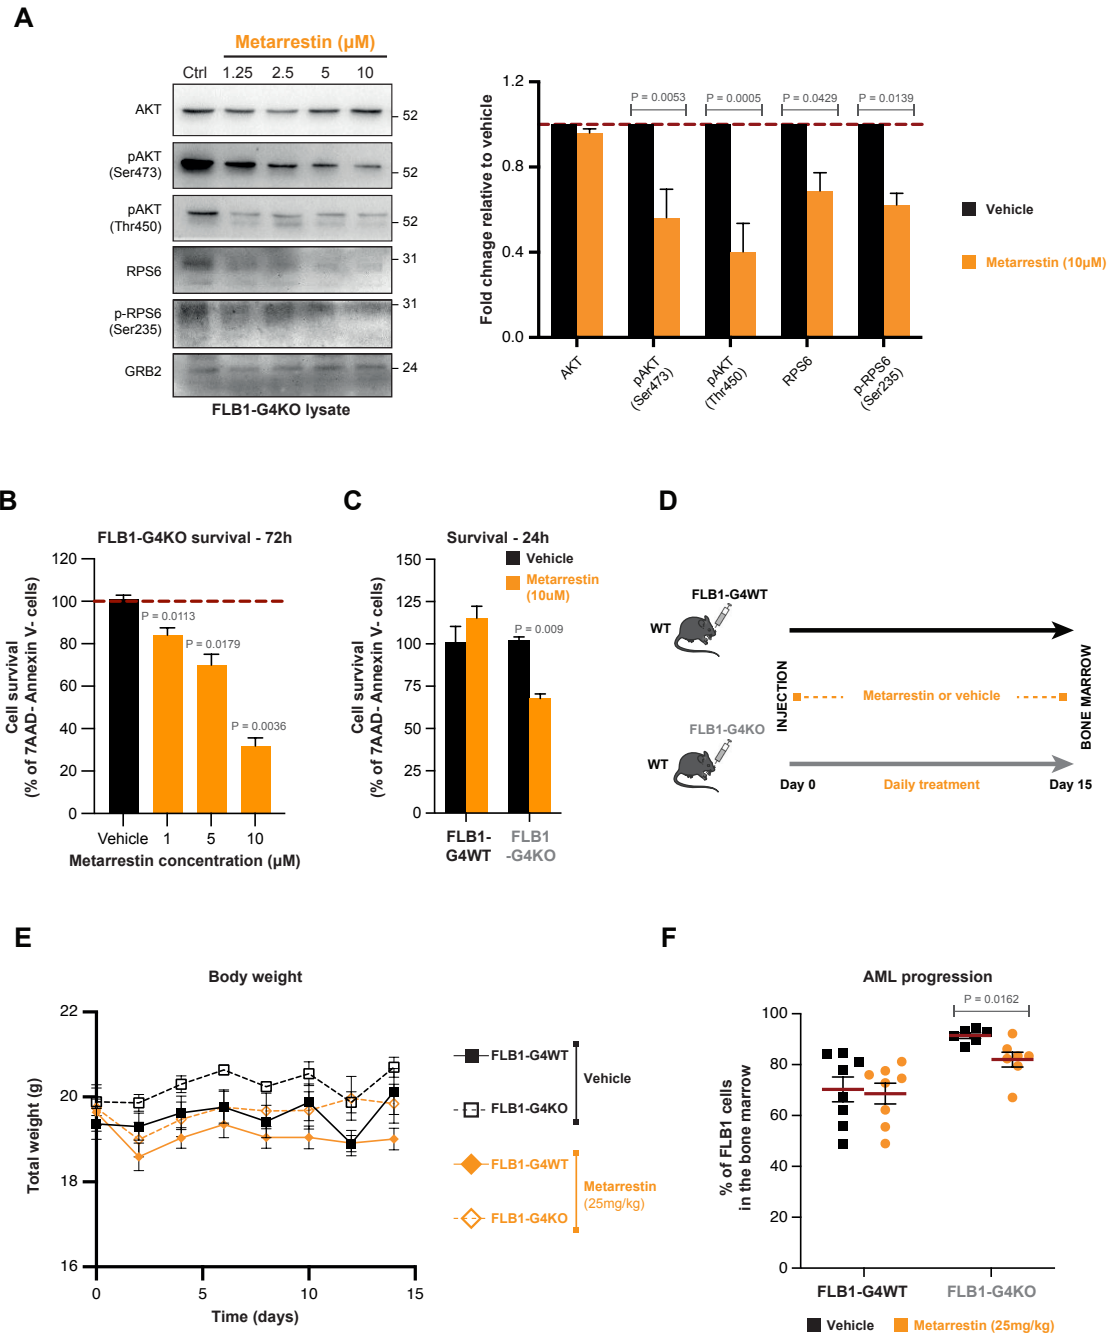

**Appendix Fig. S3 (related to Fig. 3). The EEF1A2 inhibitor Metarrestin diminishes the *in vitro* survival and *in vivo* aggressiveness of leukemia blasts educated by a syntenin-deficient host.**

(A) Left, Western blots of total cell lysates from FLB1-G4KO treated with DMSO (Ctrl) or metarrestin (1.25 to 10μM) for 16h. Different markers of cell survival were analyzed, as indicated. GRB2 was used as control. Right, histograms representing the mean signal intensities in drug-treated cells relative to the signals in FLB1-G4KO cells treated with vehicle (DMSO) ± SEM, calculated from the analysis of 3 independent experiments. Statistical analysis was performed

using the two-way analysis of variance (ANOVA). **(B)** Effect of Metarrestin treatment on FLB1-G4KO cell survival as determined in FACS. Cell survival in the presence of increasing concentrations of metarrestin was evaluated at 72h. Data represent the mean percentages of living FLB1-G4KO (CD45.1) cells  $\pm$  SEM calculated from 3 independent experiments performed in triplicate. Statistical analysis was performed using the two-way analysis of variance (ANOVA). **(C)** FLB1-G4WT and FLB1-G4KO cells were treated with DMSO (control) or 10 $\mu$ M of metarrestin for 24h. Data represent the percentage of viable (annexinV-, 7AAD-) cells normalized to control  $\pm$  SEM, calculated from 3 independent experiments performed in triplicate. Statistical analysis was performed using the one-way analysis of variance (ANOVA). **(D)** Scheme of the in vivo Metarrestin experiments. FLB1-G4WT cells were injected at day 0 into WT mice, while the inoculation of FLB1-G4KO cells into KO mice was delayed for one week, in order to synchronize the treatment. Animals were daily treated with Metarrestin or vehicle. Leukemia progression was assessed weekly, by FACS analysis as previously reported. **(E)** Daily evaluation of the body weight of each animal, treated with Metarrestin or vehicle. **(F)** FLB1 cell (CD45.1) frequencies in bone marrow aspirates were measured 15 days after cell inoculation. Results are expressed as mean percentage of FLB1 cells in the bone marrow  $\pm$  SEM. Statistical analysis was performed using Unpaired t-test.

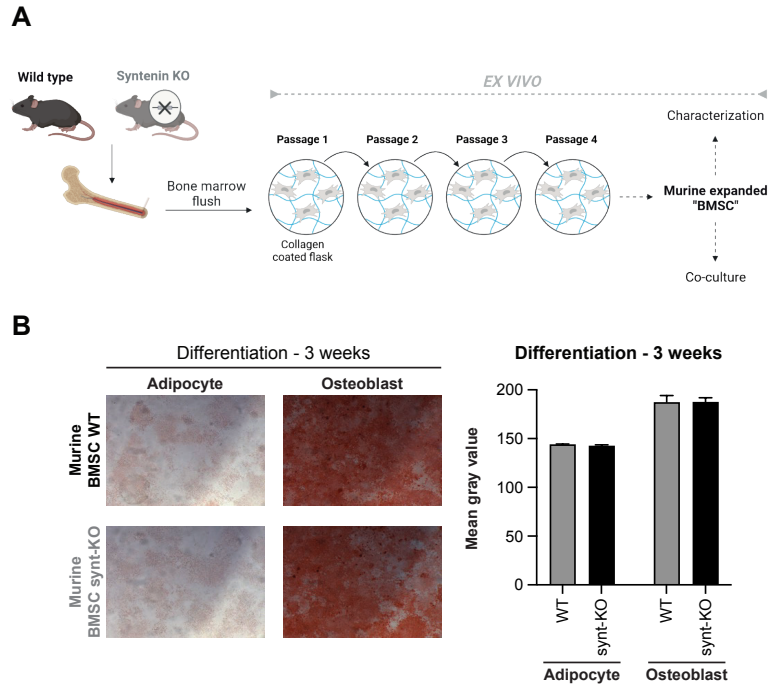

**Appendix Fig. S4 (related to figure 4). Murine BMSC isolation and characterization.**

**(A)** Scheme illustrating the protocol for the preparation of murine expanded BMSC. 5-6w old WT and synt-KO mice were sacrificed, hind limbs were collected, and bones were flushed. Whole BM was plated on collagen coated flasks and expanded *ex vivo*. Hematopoietic cells were gradually eliminated by several washes, medium changes and at least four passages. **(B)** Characterization of the differentiation potential of BMSC. Expanded BMSC, WT and synt-KO, at passage 4 were cultivated under specific osteogenic or adipogenic conditions for 21 days. Alizarin Red and Red oil staining were performed to assess, respectively, Ca<sup>2+</sup> deposition after osteogenic induction and lipid droplet accumulation after adipocyte differentiation. Note the similar differentiation profiles of WT and synt-KO BMSCs. The histograms represent the mean gray levels quantified with Image J from 5-6 images per condition.



**A**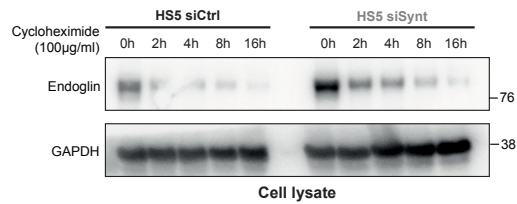**B**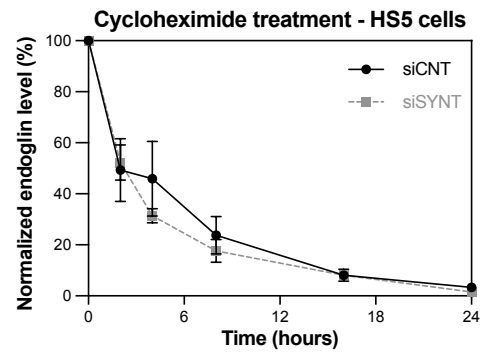

**Appendix Figure S5 (related to Figure 5). Syntenin does not affect endoglin protein stability. (A)** HS5 cells transfected with siRNA directed against syntenin (siSynt) or control (siCtrl) were treated with cycloheximide (100 µg/ml) and harvested at specific time points (0, 2, 4, 8, 16, and 24 h). Cells were then lysed and analyzed by Western blot for indicated markers. **(B)** Graphs representing mean endoglin signal intensities  $\pm$  SEM, relative to GAPDH and normalized to time 0 for each condition, calculated from the analysis of 3 independent experiments.

| REAGENT OR RESOURCE                                       | NAME                                                   | SOURCE            | REFERENCE                           | USE                          | DILUTION/CONCENTRATION             |
|-----------------------------------------------------------|--------------------------------------------------------|-------------------|-------------------------------------|------------------------------|------------------------------------|
| Antibodies                                                | CD45.1 (Ly-5.1) clone A20, FITC                        | BD Biosciences    | 564704                              | Flow cytometry               | 1/100                              |
|                                                           | CD45.1 (Ly-5.1) clone A20, PE CF594                    | BD Biosciences    | 562452                              | Flow cytometry               | 1/100                              |
|                                                           | CD45.2 (Ly-5.2) clone 104, PerCP-Cyanine5.5            | eBioscience       | 45-0454-82                          | Flow cytometry               | 1/500                              |
|                                                           | CD45.2 (Ly-5.2) clone 104, PE                          | BioLegend         | 109808                              | Flow cytometry               | 1/500                              |
|                                                           | TER-119 (Ly-76), PE                                    | BioLegend         | 116208                              | Flow cytometry               | 1/500                              |
|                                                           | CD3e clone 17A2, PE                                    | BioLegend         | 100206                              | Flow cytometry               | 1/800                              |
|                                                           | CD4 clone RM4-5, PE                                    | eBioscience       | 12-0043-82                          | Flow cytometry               | 1/500                              |
|                                                           | CD8a clone 53-6.7, PE                                  | eBioscience       | 12-0081-82                          | Flow cytometry               | 1/500                              |
|                                                           | Gr1 (Ly6G) cloneRB6-8C5, PE                            | eBioscience       | 12-5931-81                          | Flow cytometry               | 1/100                              |
|                                                           | CD51 (Integrin alpha V) clone RMV-7, Biotin            | eBioscience       | 13-0512-81                          | Flow cytometry               | 1/200                              |
|                                                           | Ly-6A/E (Sca-1) clone D7, BV421                        | BD Biosciences    | 562729                              | Flow cytometry               | 1/600                              |
|                                                           | CD54 (ICAM-1) clone 3E2, BV421                         | BD Biosciences    | 553332                              | Flow cytometry               | 1/100                              |
|                                                           | CD106 (VCAM-1) clone 429, FITC                         | BD Biosciences    | 553775                              | Flow cytometry               | 1/100                              |
|                                                           | CD44 clone IM7, PerCP-Cyanine5.5                       | eBioscience       | 45-0441-82                          | Flow cytometry               | 1/200                              |
|                                                           | CD295 (Leptin receptor)                                | R&D               | BAF497                              | Flow cytometry               | 1/100                              |
|                                                           | CD44, clone IM7, PerCP-Cyanine5.5                      | eBioscience       | 45-0441-82                          | Flow cytometry               | 1/200                              |
|                                                           | Mouse CD105 (Endoglin), clone MJ77/18, PE/C594         | BD Biosciences    | 562762                              | Flow cytometry               | 1/500                              |
|                                                           | Human CD45 clone HI30, Pacific Blue                    | BioLegend         | 304021                              | Flow cytometry               | 1/20                               |
|                                                           | Human CD105 (Endoglin) Fluorescein-conjugated Antibody | R&D               | FAB10971F                           | Flow cytometry               | 1/20                               |
|                                                           | Mouse IgG1 Isotype control                             | R&D               | MAB002                              | Flow cytometry               | 1/20                               |
|                                                           | Human CD3 clone UCHT1, Spark Violet 538                | BioLegend         | 300483                              | Flow cytometry               | 1/80                               |
|                                                           | Human CD14 clone M5E2, Alexa Fluor 700                 | BD Biosciences    | 557923                              | Flow cytometry               | 1/50                               |
|                                                           | Human CD41 clone P2, PE                                | Beckman Coulter   | A07781                              | Flow cytometry               | 1/50                               |
|                                                           | Human CD19 clone SJ25C1, PE/Cyanine5                   | BioLegend         | 363041                              | Flow cytometry               | 1/50                               |
|                                                           | Human CD45 clone HI30, PerCP-eFluor 710                | eBioscience       | 46-0459-42                          | Flow cytometry               | 1/25                               |
|                                                           | Human CD235a clone HIR2, APC                           | BD Pharmingen     | 551336                              | Flow cytometry               | 1/100                              |
|                                                           | Human CD31 clone WM59, Brilliant Violet 421            | BioLegend         | 303124                              | Flow cytometry               | 1/50                               |
|                                                           | GAPDH                                                  | Proteintech       | 10494-1-AP                          | Western blot                 | 1/5000                             |
|                                                           | Tubulin clone DM1A                                     | Sigma Aldrich     | T6199                               | Western blot                 | 1/10000                            |
|                                                           | GRB2                                                   | BD Biosciences    | 610112                              | Western blot                 | 1/1000                             |
|                                                           | Syntenin clone 96                                      | Homemade          | -                                   | Western blot                 | 1/1000                             |
|                                                           | Alix clone 67                                          | Homemade          | -                                   | Western blot                 | 1/500                              |
|                                                           | Flotillin-1 clone 18                                   | BD Biosciences    | 610820                              | Western blot                 | 1/1000                             |
|                                                           | TSG101, clone C2                                       | Santa Cruz        | sc-7964                             | Western blot                 | 1/1000                             |
|                                                           | Endoglin A8                                            | Santa Cruz        | sc-376381                           | Western blot                 | 1/50                               |
|                                                           | Endoglin P3D1                                          | Santa Cruz        | sc-18883                            | Confocal microscopy          | 1/50                               |
|                                                           | Syntenin EPR8102                                       | Abcam             | ab133267                            | Confocal microscopy          | 1/500                              |
|                                                           | EEF1A2                                                 | GeneTex           | GTX102326                           | Western blot, Flow cytometry | 1/100                              |
|                                                           | RICTOR clone 53A2                                      | Cell signaling    | 2114                                | Western blot                 | 1/1000                             |
|                                                           | pT1135 RICTOR clone D30A                               | Cell signaling    | 3806                                | Western blot                 | 1/1000                             |
|                                                           | AKT                                                    | Cell signaling    | 9272                                | Western blot                 | 1/1000                             |
|                                                           | pS473 AKT clone D9E                                    | Cell signaling    | 4060                                | Western blot, Flow cytometry | 1/2000, 1/100                      |
|                                                           | pT450 AKT                                              | Cell signaling    | 9267                                | Western blot                 | 1/1000                             |
|                                                           | RPS6 clone 54D2                                        | Cell signaling    | 2317                                | Western blot                 | 1/1000                             |
|                                                           | pS235/236 RPS6 clone D572.2E                           | Cell signaling    | 4858                                | Western blot, Flow cytometry | 1/2000, 1/50                       |
| Donkey anti-rabbit IgG secondary antibody Alexa Fluor 488 | Life Technologies                                      | A21206            | Confocal microscopy                 | 1/2000                       |                                    |
| Donkey anti-rabbit IgG secondary antibody Alexa Fluor 555 | Life Technologies                                      | A31572            | Confocal microscopy, Flow cytometry | 1/2000                       |                                    |
| Goat anti-rabbit IgG secondary antibody APC               | Life Technologies                                      | A10931            | Flow cytometry                      | 1/2000                       |                                    |
| Chemicals & proteins                                      | Collagen 1, Rat tail                                   | Life Technologies | A1048301                            |                              | 5µg/cm2                            |
|                                                           | Insulin human, recombinant                             | Sigma Aldrich     | I2643-25MG                          |                              | 10µg/ml                            |
|                                                           | Dexamethasone                                          | Sigma Aldrich     | D4902-25MG                          |                              | 1µM                                |
|                                                           | 3-Isobutyl-1-methylxanthine                            | Sigma Aldrich     | I5879-100MG                         |                              | 500µg/ml                           |
|                                                           | β-Glycerophosphate disodium salt hydrate               | Sigma Aldrich     | G9422-10G                           |                              | 10mM                               |
|                                                           | L-Ascorbic acid                                        | Sigma Aldrich     | A5960-10MG                          |                              | 50µg/ml                            |
|                                                           | DAPI fluoromount G                                     | Cliniscience      | 0100-20                             | Immunofluorescence           | 1/2000                             |
|                                                           | Alexa Fluor 555 Azide 0.5mg                            | Life Technologies | A20012                              | Flow cytometry               | 5µM                                |
|                                                           | LIVE/DEAD® Fixable Far Red Dead Cell Stain             | Life Technologies | L10120                              | Flow cytometry               | 1/1000                             |
|                                                           | Draq 7                                                 | Biolegend         | 424001                              | Flow cytometry               | 1/400                              |
|                                                           | SYTOX Blue Nucleic Acid Stain                          | Life Technologies | S11348                              | Flow cytometry               | 500nM                              |
|                                                           | Live/DEAD® Fixable Blue                                | Life Technologies | L23105                              | Flow cytometry               | 1/1000                             |
|                                                           | Propidium iodide (PI)                                  | eBioscience       | BMS500PI                            | Flow cytometry               | 40µg/ml                            |
|                                                           | CountBright™ Absolute Counting Beads                   | Life Technologies | C36950                              | Flow cytometry               | 1/100                              |
|                                                           | True-Stain Monocyte Blocker                            | BioLegend         | 426102                              | Flow cytometry               | 1/50                               |
|                                                           | Human BD FcBlock                                       | BD Pharmingen     | 564220                              | Flow cytometry               | 1/50                               |
|                                                           | Oil Red O solution , 0.5% in isopropanol               | Sigma Aldrich     | O1391-250ML                         |                              | -                                  |
|                                                           | Alizarin-red staining solution                         | Sigma Aldrich     | TMS-008-C                           |                              | -                                  |
|                                                           | O-Propargyl-puromycin                                  | Jena Bioscience   | NU-931-5                            |                              | 10µM (in vitro), 50mq/ka (in vivo) |
|                                                           | Annexin V Apoptosis detection kit PE                   | Life Technologies | 88-8102-72                          | Flow cytometry               | 1/50                               |
|                                                           | Annexin V Apoptosis detection kit APC                  | Life Technologies | 88-8007-72                          | Flow cytometry               | 1/50                               |
|                                                           | Click-it cell reaction buffer                          | Life Technologies | C10269                              | Flow cytometry               | -                                  |
|                                                           | Metarrestin (ML-246)                                   | Cliniscience      | AOB1384                             |                              | 10µM (in vitro), 25mq/ka (in vivo) |

Appendix Table S1. Antibodies and reagents

| Species | Primers  | Forward (Fw) /<br>Reverse (Rv) | Sequence 5'-3'           |
|---------|----------|--------------------------------|--------------------------|
| Human   | SDCBP    | Fw                             | AAGGTGCTCAACAGGCTTT      |
|         |          | Rv                             | AAACCAACATGTCCAGTGCT     |
|         | GAPDH    | Fw                             | TGCCAAATATGATGACATCAAGAA |
|         |          | Rv                             | GGAGTGGGTGTCGCTGTTG      |
|         | Endoglin | Fw                             | CACTAGCCAGGTCTCGAAGG     |
|         |          | Rv                             | CTGAGGACCAGAAGCACCTC     |
|         | L32      | Fw                             | CAAGGAGCTGGAAGTGCTGC     |
|         |          | Rv                             | CAGCTCTTCCACGATGGC       |

**Appendix Table S2. List of primers for RT-qPCR analysis.**
